# Supplementary material for: Lanthanides post-functionalized nanocrystalline metal–organic frameworks for tunable white-light emission and orthogonal multi-readout thermometry
Source: Royal Society of Chemistry journal article supplement (doi:10.1039/c4nr06873d), 2015-01-01
Supplement: c4nr06873d2.pdf [file c4nr06873d2.pdf]

# Supporting Information

## **Lanthanides post-functionalized nanocrystalline metal-organic frameworks for tunable white-light emission and orthogonal multi-readout thermometry**

You Zhou, Bing Yan\*

Department of Chemistry, Tongji University, Siping Road 1239, Shanghai 200092, China

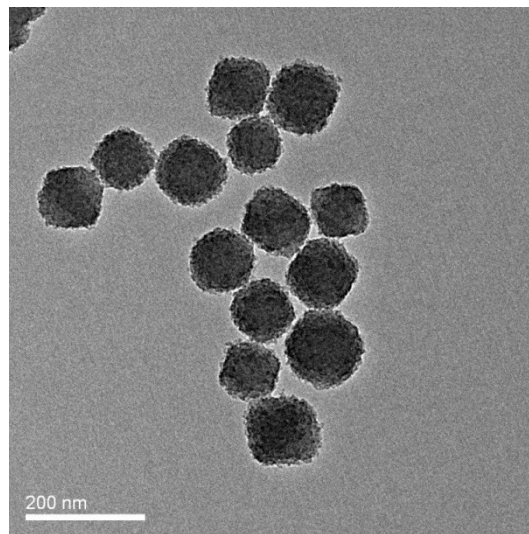

**Figure S1.** TEM image of  $\text{Eu}^{3+}@1$ .

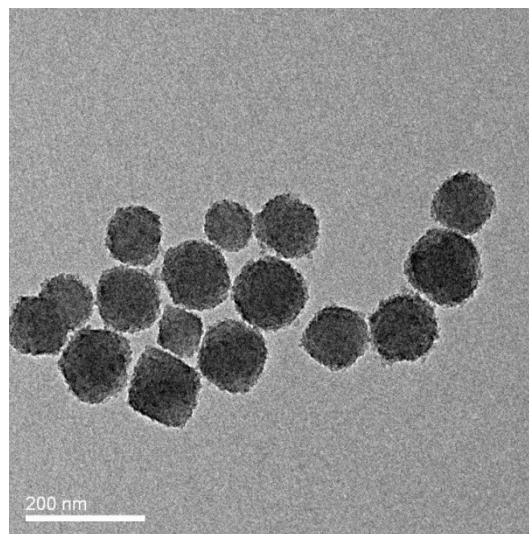

**Figure S2.** TEM image of  $\text{Tb}^{3+}@1$ .

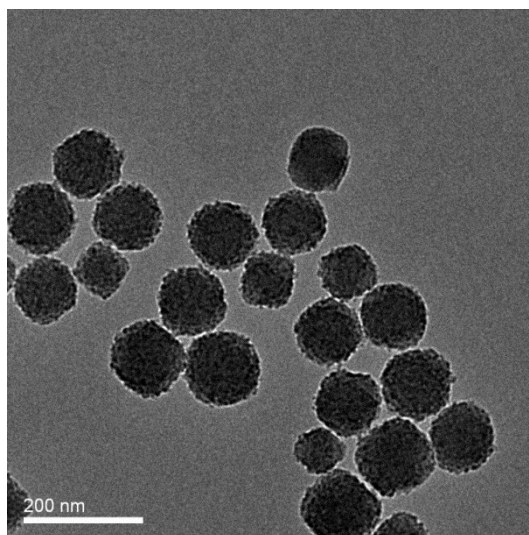

**Figure S3.** TEM image of  $\text{Eu}^{3+}/\text{Tb}^{3+}@1$ .

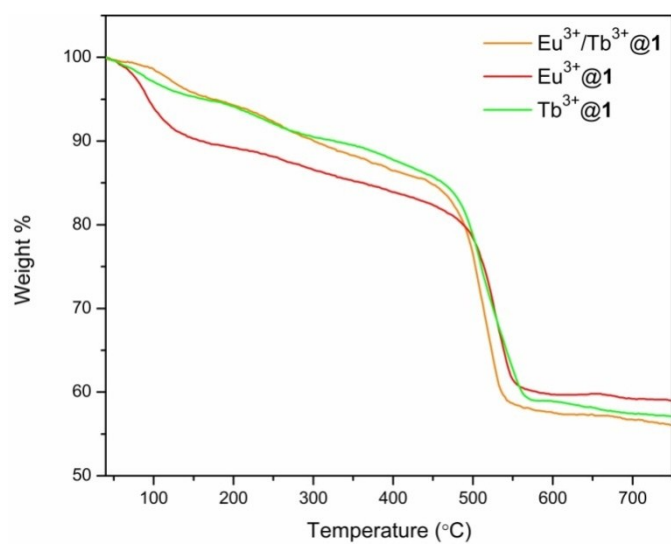

**Figure S4.** TGA curves of  $\text{Ln}^{3+}@1$  products ( $\text{Ln}^{3+} = \text{Eu}^{3+}, \text{Tb}^{3+}, \text{Eu}^{3+}/\text{Tb}^{3+}$ ) in the range of 40-750 °C.

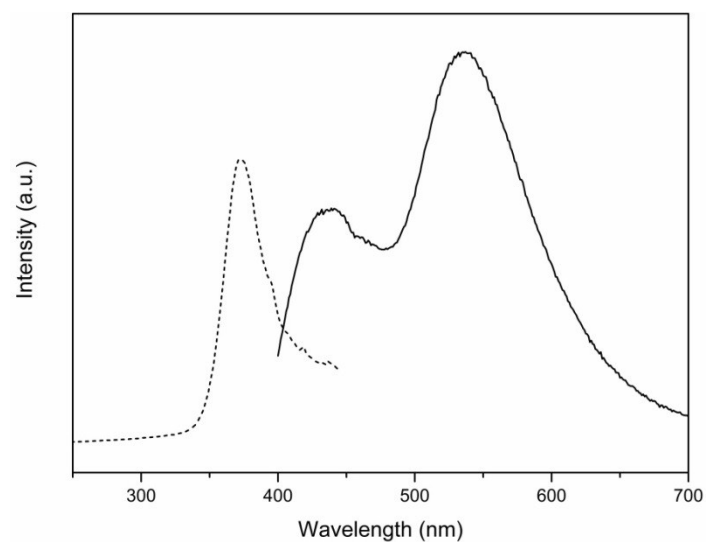

**Figure S5.** Excitation (dash line) and emission (solid line) spectra of MOF **1**.

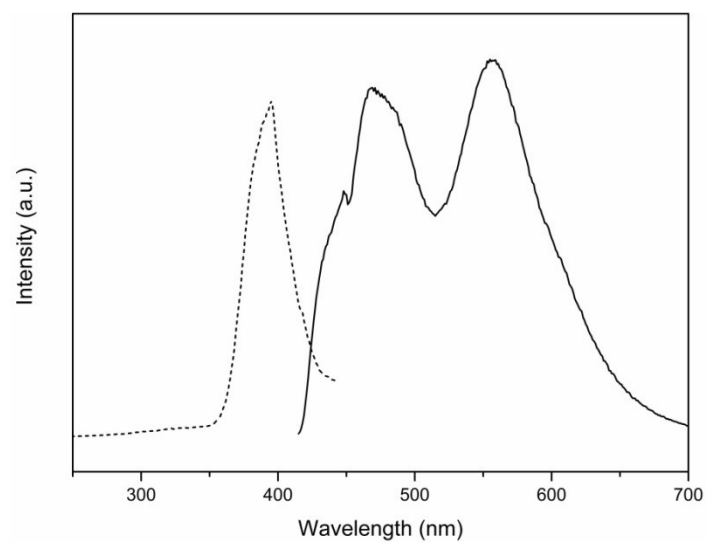

**Figure S6.** Excitation (dash line) and emission (solid line) spectra of the free ligand H<sub>2</sub>bpydc.

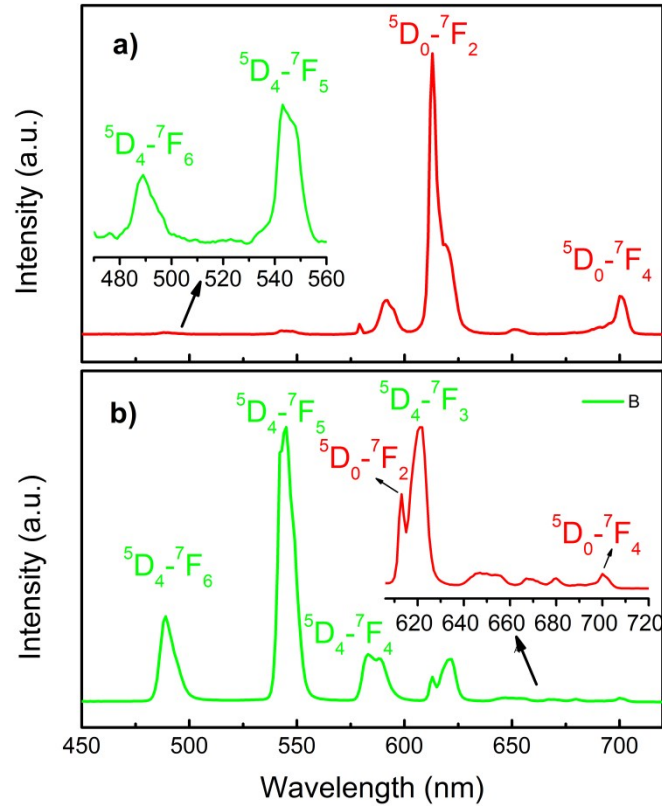

**Figure S7.** The emission spectra ( $\lambda_{\text{ex}} = 338 \text{ nm}$ ) of  $\text{Eu}^{3+}/\text{Tb}^{3+}@1$  resulted from different feed ratios of  $\text{Eu}^{3+}$  and  $\text{Tb}^{3+}$ : a) 0.01:0.99; b) 0.001:0.999. The inset in a) is the emission spectrum of a) with in the wavelength in the range of 470-560 nm, while the inset in b) is the emission spectrum of b) with wavelength in the range of 607-720 nm.

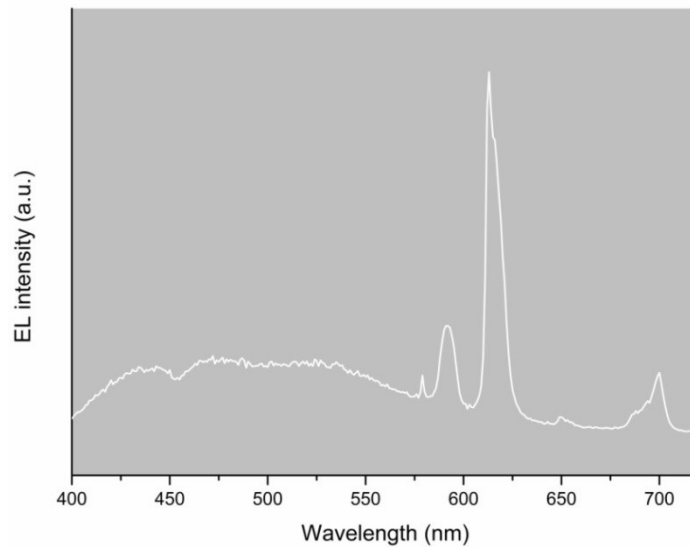

**Figure S8.** Electroluminescent (EL) spectra of the as-fabricated white LED under drive current of 150 mA.

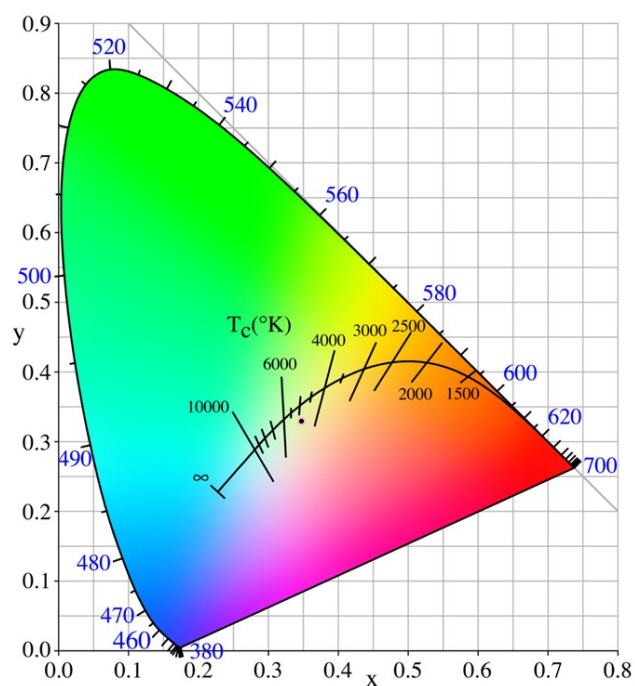

**Figure S9.** The chromaticity coordinates of the as-fabricated white LED with correlated color temperatures (CCTs) of 4914 K under a drive current of 150 mA in CIE chromaticity diagram.

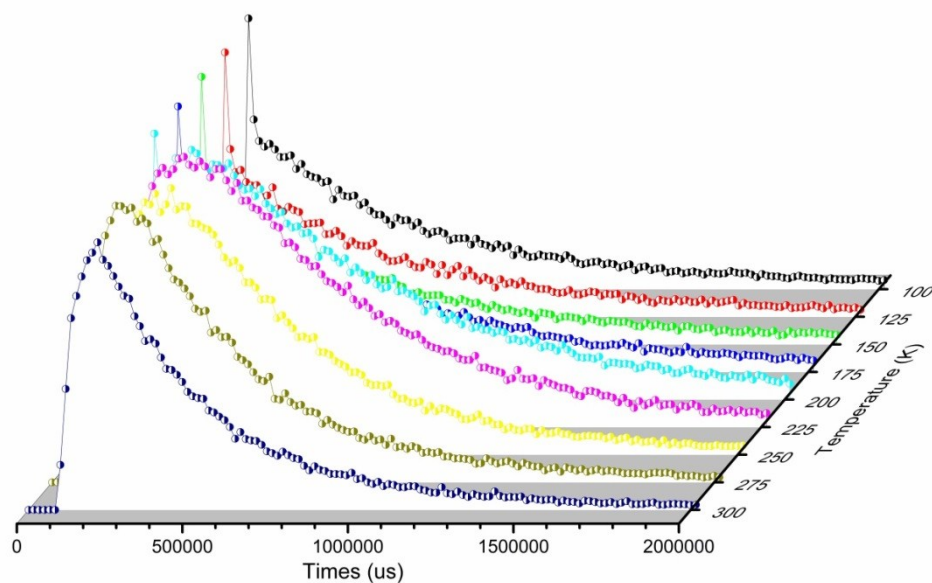

**Figure S10.** Temperature-dependent  ${}^5D_0$  decay curves of  $\text{Eu}^{3+}/\text{Tb}^{3+}@1$ .

**Table S1.** The loading level of Ln<sup>3+</sup> cations of Ln<sup>3+</sup>@1 (Ln<sup>3+</sup> = Eu<sup>3+</sup>, Tb<sup>3+</sup>, Eu<sup>3+</sup>/Tb<sup>3+</sup>) determined by ICPMS.

| Ln <sup>3+</sup> /Zr <sup>4+</sup> (Atomic%) | Eu <sup>3+</sup> @1 | Tb <sup>3+</sup> @1 | Eu <sup>3+</sup> /Tb <sup>3+</sup> @1 |
|----------------------------------------------|---------------------|---------------------|---------------------------------------|
| Ln <sup>3+</sup> = Eu <sup>3+</sup>          | 19.3                | —                   | 0.13                                  |
| Ln <sup>3+</sup> = Tb <sup>3+</sup>          | —                   | 25.1                | 21.8                                  |

**Table S2.** Temperature-dependent luminescent Lifetimes ( $\tau$ ) of Ln<sup>3+</sup>@1 (Ln<sup>3+</sup> = Eu<sup>3+</sup>, Tb<sup>3+</sup>, Eu<sup>3+</sup>/Tb<sup>3+</sup>).

| T (K) | $\tau$ (ms)                      |                                  |                                                                                   |                                                                                   |
|-------|----------------------------------|----------------------------------|-----------------------------------------------------------------------------------|-----------------------------------------------------------------------------------|
|       | Eu <sup>3+</sup> @1 <sup>a</sup> | Tb <sup>3+</sup> @1 <sup>b</sup> | Eu <sup>3+</sup> /Tb <sup>3+</sup> @1( <sup>5</sup> D <sub>0</sub> ) <sup>c</sup> | Eu <sup>3+</sup> /Tb <sup>3+</sup> @1( <sup>5</sup> D <sub>4</sub> ) <sup>d</sup> |
| 100   | 0.292                            | 0.730                            | 0.666                                                                             | 0.720                                                                             |
| 125   | 0.294                            | 0.721                            | 0.652                                                                             | 0.715                                                                             |
| 150   | 0.290                            | 0.688                            | 0.670                                                                             | 0.685                                                                             |
| 175   | 0.287                            | 0.640                            | 0.690                                                                             | 0.629                                                                             |
| 200   | 0.282                            | 0.574                            | 0.701                                                                             | 0.528                                                                             |
| 225   | 0.275                            | 0.464                            | 0.633                                                                             | 0.380                                                                             |
| 250   | 0.269                            | 0.282                            | 0.537                                                                             | 0.226                                                                             |
| 275   | 0.264                            | 0.183                            | 0.491                                                                             | 0.121                                                                             |
| 300   | 0.258                            | 0.117                            | 0.471                                                                             | 0.061                                                                             |

<sup>a,c</sup> For the <sup>5</sup>D<sub>0</sub> → <sup>7</sup>F<sub>2</sub> transition of Eu<sup>3+</sup>,  $\lambda_{\text{ex}} = 340$  nm,  $\lambda_{\text{em}} = 616$  nm. <sup>b,d</sup> The transition <sup>5</sup>D<sub>4</sub> → <sup>7</sup>F<sub>5</sub> of Tb<sup>3+</sup>,  $\lambda_{\text{ex}} = 340$  nm,  $\lambda_{\text{em}} = 544$  nm.
